# Supplementary material for: Oncolytic herpes virus G47Δ works synergistically with CTLA-4 inhibition via dynamic intratumoral immune modulation
Source: PubMed Central journal article supplement — Mol Ther Oncolytics. 2021 May 19;22:129–42. doi: 10.1016/j.omto.2021.05.004 (PMC8413837; doi:10.1016/j.omto.2021.05.004), 2021-05-19
Supplement: mmc1.pdf [file mmc1.pdf]

**OMTO, Volume 22**

**Supplemental information**

**Oncolytic herpes virus G47 $\Delta$  works  
synergistically with CTLA-4 inhibition  
via dynamic intratumoral immune modulation**

**Kotaro Sugawara, Miwako Iwai, Hiroataka Ito, Minoru Tanaka, Yasuyuki Seto, and Tomoki  
Todo**

Supplementary Figures and Tables

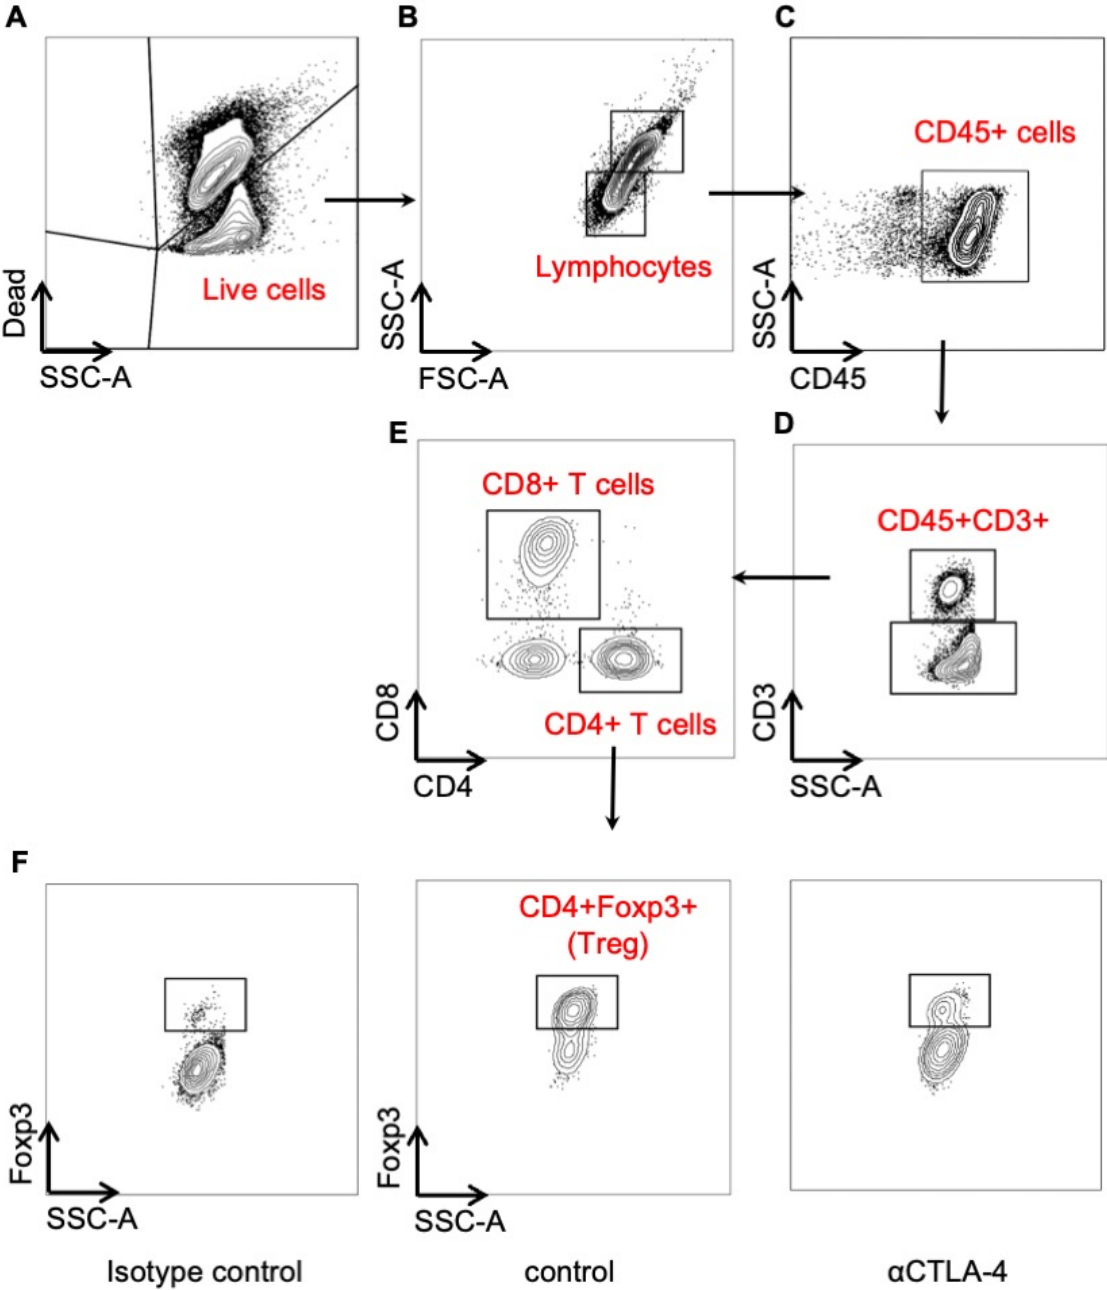

Supplementary Figure 1. Gating strategy

Representative flow cytometry plots and the gating strategy are shown. (A, B, C, D) T cells were assessed as CD45<sup>+</sup>CD3<sup>+</sup> after dead cells and doublets had been removed. (E) CD8<sup>+</sup> and CD4<sup>+</sup> T cells and (F) Tregs (Foxp3<sup>+</sup>CD4<sup>+</sup> T cells) were determined based on the isotype control. Left; isotype control, middle; control, right; anti-CTLA-4.

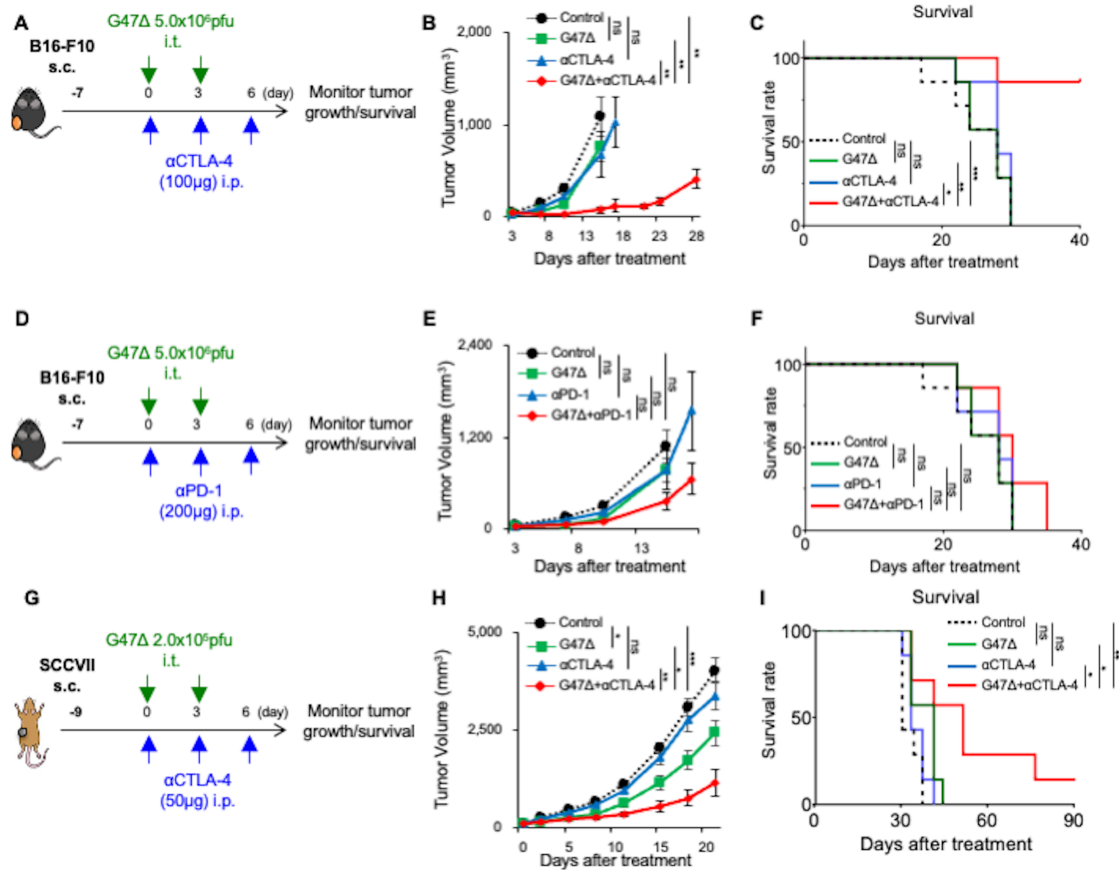

**Supplementary Figure 2. Efficacy of the combination of G47Δ and ICIs in syngeneic B16-F10 and SCCVII subcutaneous tumors**

(A-C) Effects of G47Δ and CTLA-4 inhibition, either alone or in combination, on the growth of subcutaneous B16-F10 tumors in syngeneic C57BL/6 mice (n=7 per group).

(A) Experimental design. Tumor growth (B) and Kaplan–Meier survival curves (C).

The tumor growth was not suppressed by each monotherapy, but was significantly

inhibited by the combination therapy (vs. control and monotherapies,  $P < 0.01$ ). (D-F)

Effects of G47Δ and PD-1 inhibition, either alone or in combination, on the growth of

subcutaneous B16-F10 tumor model (n=7 per group). (D) Experimental design.

Tumor growth (E) and Kaplan–Meier survival curves (F). Neither tumor growth nor

survival differed significantly among the four treatment groups. (G-I) Effects of G47Δ

and CTLA-4 inhibition, either alone or in combination, on the growth of subcutaneous

SCCVII tumors in syngeneic C3H mice (n=7 per group). (G) Experimental design.

Tumor growth (H) and Kaplan–Meier survival curves (I). The tumor growth was

inhibited by G47Δ alone (vs. control,  $P < 0.05$ ) and the efficacy was enhanced by the

combination therapy (vs. G47Δ;  $P < 0.01$ , vs. αCTLA-4;  $P < 0.001$ ). One-way

ANOVA followed by Dunnett's test was used for comparisons of tumor growth. For

survival analysis, the log-rank test followed by Holm's sequential Bonferroni

corrections was used to determine statistical significance (\*,  $P < 0.05$ ; \*\*,  $P < 0.01$ ; \*\*\*,

$P < 0.001$ ; ns, not significant).

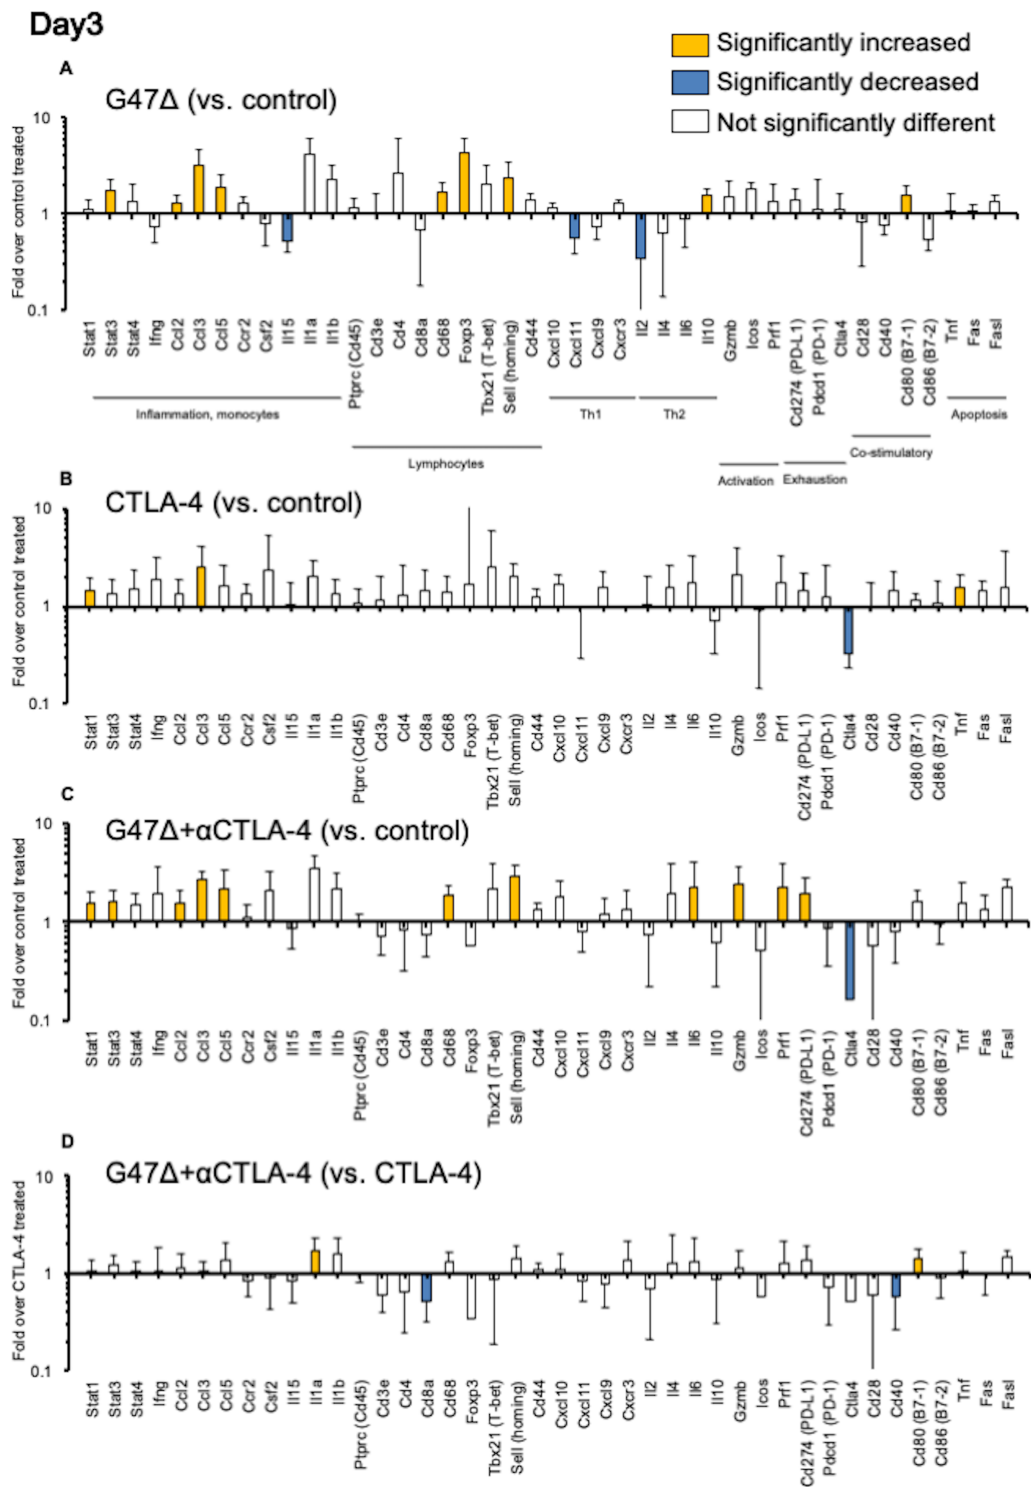

**Supplementary Figure 3. Intratumoral immune-related gene expression changes in subcutaneous AKR tumors 3 days after the initial treatment**

C57BL/6 mice bearing AKR tumors were treated according to the schedule shown in Figure 2A. Tumor tissues were harvested 3 days after the initial treatments, and gene expressions were analyzed using qPCR analysis. The fold change in expression of the indicated genes (A) with G47 $\Delta$  treatment over control, (B) with CTLA-4 inhibition over control, (C) with the combination therapy over control and (D) the combination therapy over CTLA-4 inhibition. The bar represents mean fold change + SEM (n=6). The yellow bars represent mRNAs that were significantly upregulated ( $P < 0.05$ , fold change  $\geq 2$ ) as compared with the reference group. The blue bars show mRNAs that were significantly downregulated ( $P < 0.05$ , fold change  $< 0.5$ ) as compared with the reference group. The expression data were normalized to the geometric mean of three housekeeping genes (*Actb*, *Gapdh*, and *Hprt1*). One-way ANOVA followed by Dunnett's test was used to determine statistical significance. All experiments were performed twice, with six samples for each group.

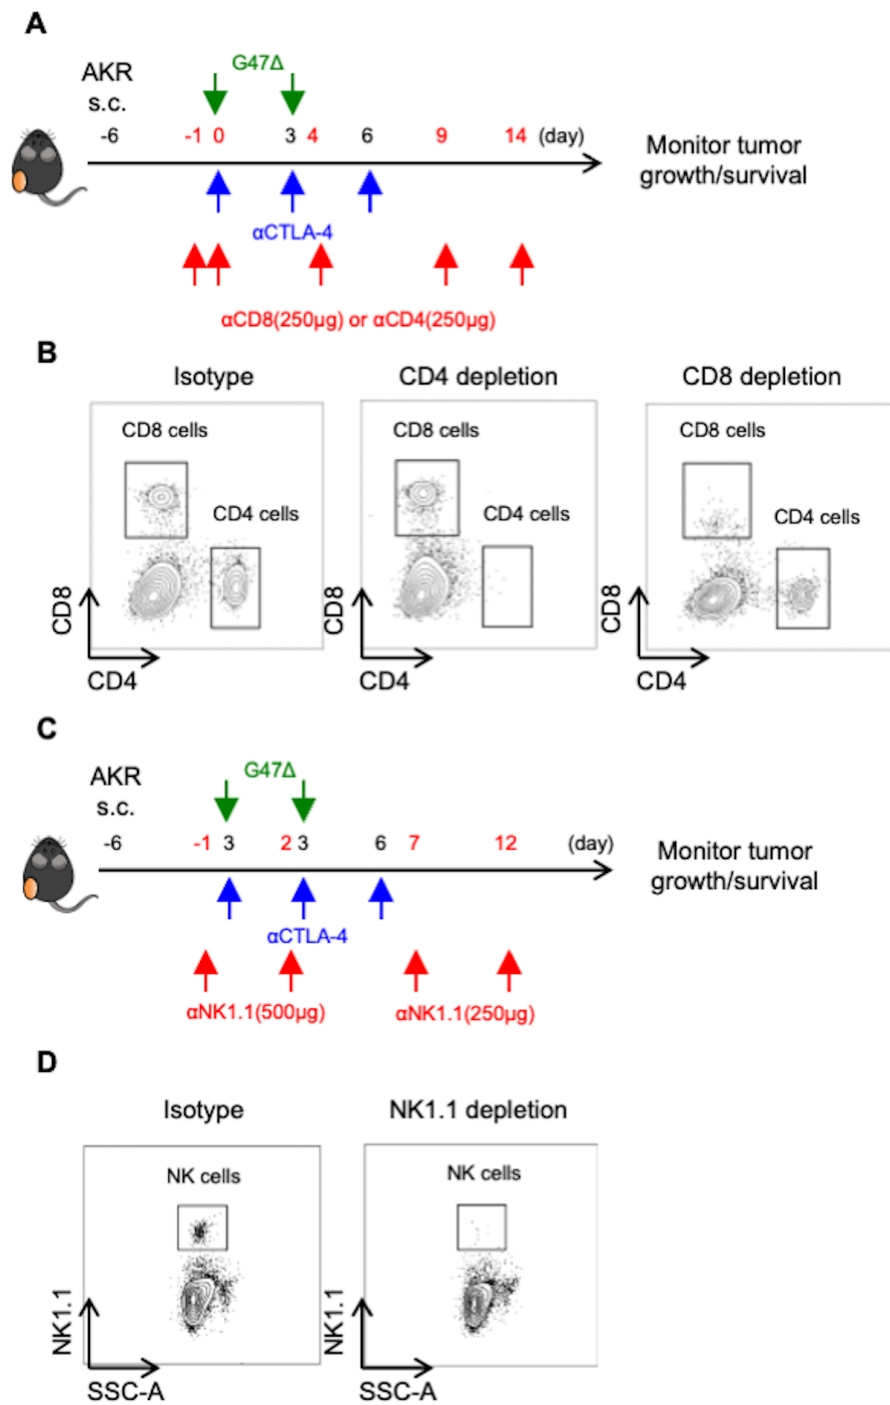

**Supplementary Figure 4. Experimental design of depletion assays and validation of immune cell depletion**



C57BL/6 mice were implanted with AKR cells in the left flank on day -6, intratumorally inoculated with G47 $\Delta$  ( $5 \times 10^6$  pfu), or mock on days 0 and 3, and injected intraperitoneally with an anti-CTLA-4 antibody (25  $\mu$ g) or Syrian hamster IgG on days 0, 3, and 6. Arrows indicate intratumoral injections with G47 $\Delta$  (green), intraperitoneal injections with an anti-CTLA-4 antibody (blue) or administration of depletion antibodies (red). (A) Depletion antibodies against CD4 or CD8 (250  $\mu$ g) were injected intraperitoneally on days -1, 0, 4, 9, and 14 as indicated. (B) On days 0 and 4, the mice were sacrificed, spleens collected, splenocytes isolated and stained with or without anti-mouse CD4 and CD8a antibodies, analyzed using flow cytometry, and adequate cell depletion of each cell subset was confirmed. (C) The mice were injected with 500  $\mu$ g of the depletion antibody, NK1.1, on days -1 and 2, followed by injection of 250  $\mu$ g every 5 days throughout the experiment as indicated. (D) On days 0 and 7, adequate NK cell depletion was confirmed.

**Supplementary Table 1. Gene symbols of a custom panel**

| No. | Gene Symbols  | Assay IDs     | No. | Gene Symbols | Assay IDs     |
|-----|---------------|---------------|-----|--------------|---------------|
| 1   | <i>Actb</i>   | Mm00607939_s1 | 25  | <i>Cd3e</i>  | Mm00599683_m1 |
| 2   | <i>Hprt</i>   | Mm00446968_m1 | 26  | <i>Cd4</i>   | Mm00442754_m1 |
| 3   | <i>Gapdh</i>  | Mm99999915_g1 | 27  | <i>Cd68</i>  | Mm00839636_g1 |
| 4   | <i>Stat1</i>  | Mm00439518_m1 | 28  | <i>Cd8a</i>  | Mm01182106_g1 |
| 5   | <i>Stat3</i>  | Mm00456961_m1 | 29  | <i>Ptpnc</i> | Mm00448463_m1 |
| 6   | <i>Stat4</i>  | Mm00448890_m1 | 30  | <i>Tbx21</i> | Mm00450960_m1 |
| 7   | <i>Cd19</i>   | Mm00515420_m1 | 31  | <i>Foxp3</i> | Mm00475162_m1 |
| 8   | <i>Ifng</i>   | Mm00801778_m1 | 32  | <i>Sell</i>  | Mm00441291_m1 |
| 9   | <i>Il1a</i>   | Mm00439620_m1 | 33  | <i>Cd44</i>  | Mm01277161_m1 |
| 10  | <i>Il1b</i>   | Mm00434228_m1 | 34  | <i>Gzmb</i>  | Mm00442834_m1 |
| 11  | <i>18S</i>    | Hs99999901_s1 | 35  | <i>Icos</i>  | Mm00497600_m1 |
| 12  | <i>Il15</i>   | Mm00434210_m1 | 36  | <i>Prfl</i>  | Mm00812512_m1 |
| 13  | <i>Ccl5</i>   | Mm01302428_m1 | 37  | <i>Ccr2</i>  | Mm99999051_gH |
| 14  | <i>Cxcl10</i> | Mm00445235_m1 | 38  | <i>Ccl2</i>  | Mm00441242_m1 |
| 15  | <i>Cxcl11</i> | Mm00444662_m1 | 39  | <i>Ccl3</i>  | Mm00441258_m1 |
| 16  | <i>Cxcr3</i>  | Mm00438259_m1 | 40  | <i>Cd28</i>  | Mm00483137_m1 |
| 17  | <i>Cxcl9</i>  | Mm00434946_m1 | 41  | <i>Cd80</i>  | Mm00711660_m1 |
| 18  | <i>Ccr4</i>   | Mm00438271_m1 | 42  | <i>Cd86</i>  | Mm00444543_m1 |
| 19  | <i>Il10</i>   | Mm00439616_m1 | 43  | <i>Csf2</i>  | Mm00438328_m1 |
| 20  | <i>Il2</i>    | Mm00434256_m1 | 44  | <i>Cd40</i>  | Mm00441895_m1 |
| 21  | <i>Il4</i>    | Mm00445259_m1 | 45  | <i>Ctla4</i> | Mm00486849_m1 |
| 22  | <i>Fas</i>    | Mm00433237_m1 | 46  | <i>Cd274</i> | Mm03048248_m1 |
| 23  | <i>Fasl</i>   | Mm00438864_m1 | 47  | <i>Pdcd1</i> | Mm01285676_m1 |
| 24  | <i>Tnf</i>    | Mm00443258_m1 | 48  | <i>Il6</i>   | Mm00446190_m1 |

A custom panel includes one control gene (*18S*), three housekeeping genes (*Actb*,

*Gapdh*, and *Hprt*) and 44 immune-related genes.

**Supplementary Table 2. Combination index**

| Day <sup>1</sup> | FTV  |         |                       |          | CI <sup>3</sup> |
|------------------|------|---------|-----------------------|----------|-----------------|
|                  | G47Δ | αCTLA-4 | Combination           |          |                 |
|                  |      |         | Expected <sup>2</sup> | Observed |                 |
| 8                | 0.72 | 0.25    | 0.18                  | 0.12     | 0.67            |
| 12               | 0.66 | 0.08    | 0.05                  | 0.02     | 0.31            |

Abbreviations: FTV; fractional tumor volume, CI; combination index

<sup>1</sup> Day after the initial treatments

<sup>2</sup> (Mean FTV of G47Δ) × (mean FTV of αCTLA-4)

<sup>3</sup> Obtained by dividing the expected FTV by the observed FTV

FTV = (mean tumor volume experimental)/(mean tumor volume control)

CI < 1, CI = 1 and CI > 1 indicates a synergistic, an additive and antagonistic effect, respectively

The efficacy of treatments (G47Δ, αCTLA-4 and the combination) was assessed as the fractional tumor volume (FTV). FTV was calculated as described in the Materials and Methods, and the expected FTV and the combination index (CI) were estimated. CI < 1, CI = 1 and CI > 1 indicates a synergistic, an additive and antagonistic effect, respectively.
